# Supplementary material for: Characterization of the interaction between the HIV-1 Gag structural polyprotein and the cellular ribosomal protein L7 and its implication in viral nucleic acid remodeling
Source: PubMed Central journal article supplement (PMC4982112; doi:10.1186/s12977-016-0287-4), 2016-08-11
Supplement: 12977_2016_287_MOESM1_ESM.pdf [file 12977_2016_287_MOESM1_ESM.pdf]

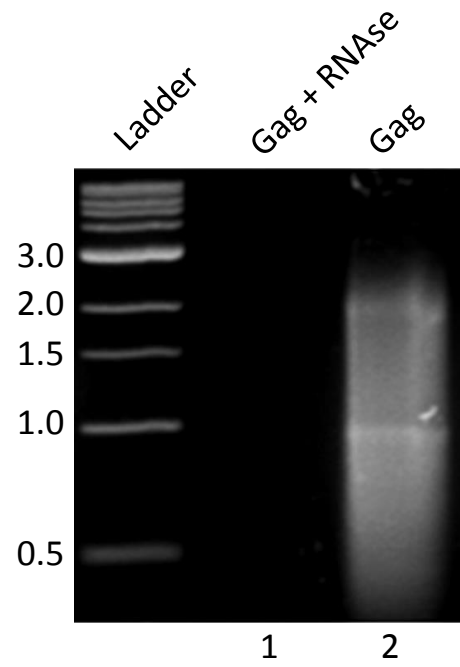

Figure S1
